# Supplementary material for: Ecological Effects of Heavy Metal Pollution on Soil Microbial Community Structure and Diversity on Both Sides of a River around a Mining Area
Source: PubMed Central journal article supplement (PMC7460318; doi:10.3390/ijerph17165680), 2020-08-06
Supplement: ijerph-17-05680-s001.pdf [file ijerph-17-05680-s001.pdf]

# Supporting Information

Ecological effects of heavy metal pollution on soil microbial community structure and diversity on both sides of a river around a mining area

International Journal of Environmental Research and Public Health

Xingqing Zhao<sup>1,\*</sup>, Jian Huang<sup>1</sup>, Xuyan Zhu<sup>1</sup>, Jinchun Chai<sup>2</sup> and Xiaoli Ji<sup>3,\*</sup>

<sup>1</sup> School of Environmental and Safety Engineering, Changzhou University, Changzhou 213164, China;

<sup>2</sup> Department of Civil Engineering and Architecture, Saga University, Saga 8408502, Japan

<sup>3</sup> School of Economics, Changzhou University, Changzhou 213164, China;

\* Correspondence: zhaoxq@cczu.edu.cn (X.Zhao); [xl.ji@163.com](mailto:xl.ji@163.com) (X.J.)

1  
2

## Supplementary materials

Supplementary materials Table S1 Mine soil physical and chemical properties and evaluation of heavy metal pollution.

| Sample area | pH    | Cu (mg/kg) | Zn (mg/kg) | Pb (mg/kg) | Cd (mg/kg) | Ni (mg/kg) | $P_N$  | RI      | MC (g/kg) | TOC (g/kg) | TN (mg/kg) | TP (mg/kg) | AK (mg/kg) |
|-------------|-------|------------|------------|------------|------------|------------|--------|---------|-----------|------------|------------|------------|------------|
| S1          | 6.28± | 1274.5±    | 594.31±    | 616.94±    | 11.16±     | 46.06±     | 13.18± | 609.24± | 0.07±     | 3.69±      | 977.46±    | 801.61±    | 53.45±     |
|             | 0.19a | 59.74e     | 61.97c     | 74.42c     | 2.04c      | 12.45ab    | 1.01c  | 54.01d  | 0.02b     | 0.64a      | 69.1a      | 56.87d     | 14.19a     |
| S2          | 7.79± | 240.57±    | 314.34±    | 193.23±    | 6.7±       | 67.77±     | 6.99±  | 325.06± | 0.04±     | 10.15±     | 1265.20±   | 458.25±    | 95.78±     |
|             | 0.59b | 81.72b     | 66.82b     | 12.89b     | 1.32ab     | 0.84c      | 0.58b  | 32.2c   | 0.01a     | 1.1bc      | 135.01b    | 16.05c     | 18.81ab    |
| S3          | 6.33± | 317.7±     | 132.59±    | 96.13±     | 5.79±      | 50.8±      | 6.20±  | 280.47± | 0.15±     | 16.12±     | 1489.23±   | 358.95±    | 110.3±     |
|             | 0.05a | 28.73b     | 28.4a      | 8.45a      | 0.6ab      | 3.47b      | 0.64b  | 28.71   | 0.02cd    | 1.08d      | 109.43b    | 57.4ab     | 19.71bc    |
| S4          | 6.11± | 397.13±    | 276.31±    | 70.48±     | 5.02±      | 43.53±     | 5.51±  | 251.04± | 0.15±     | 9.47±      | 2455.69±   | 485.17±    | 168.8±     |
|             | 0.04a | 13.11c     | 11.53b     | 5.99a      | 0.14ab     | 3.87b      | 0.38ab | 14.87ab | 0.02d     | 0.73b      | 110.09d    | 14.97c     | 14.71c     |
| S5          | 7.02± | 634.4±     | 145.18±    | 55.21±     | 4.33±      | 37.45±     | 6.17±  | 233±    | 0.09±     | 12.33±     | 1418.08±   | 428.52±    | 151.1±     |
|             | 0.66a | 36.15d     | 13.7a      | 6.04a      | 0.46ab     | 1.17ab     | 0.48b  | 15.56ab | 0.01bc    | 0.26c      | 9.92b      | 54.82c     | 21.07c     |
| S6          | 6.18± | 128.95±    | 106.96±    | 38.59±     | 5.00±      | 44.45±     | 5.24±  | 229.9±  | 0.11±     | 8.90±      | 1190.94±   | 257.92±    | 138±       |
|             | 0.07a | 11.39a     | 6.33a      | 4.53a      | 0.16ab     | 1.73b      | 0.17ab | 8.43ab  | 0.01bcd   | 0.63b      | 94.79b     | 18.33a     | 9.9bc      |
| S7          | 6.24± | 114.66±    | 107.06±    | 59.09±     | 3.11±      | 22.48±     | 3.35±  | 149.12± | 0.10±     | 15.14±     | 1776.22±   | 400.03±    | 168.5±     |
|             | 0.12a | 8.23b      | 18.12a     | 6.12a      | 0.29a      | 6.22a      | 0.31a  | 16.1a   | 0.01bcd   | 0.73d      | 152.4c     | 41.61bc    | 25.85d     |

3  
4  
5  
6  
7  
8  
9

Note: The results are expressed as the mean ± standard error a;

a: Indicates significance difference among 7 samples in different areas;

Total organic carbon (TOC); Total nitrogen (TN); Total phosphorus (TP); Available potassium (AK); Moisture content (MC).

$P_N$ : (Nemerow's pollution index).

The Grading Standards:  $P_N \leq 0.7$ , safety;  $0.7 < P_N \leq 1$ , warning limit;  $1 < P_N \leq 2$ , slight pollution;  $2 < P_N \leq 3$ , moderate pollution;  $P_N > 3$ , heavy pollution.

Potential ecological risk assessment (RI):  $RI < 150$ , low potential ecological risk;  $150 \leq RI < 300$ , moderate ecological risk;  $300 \leq RI < 600$ , considerable ecological risk;  $RI \geq 600$  very

high ecological risk. Background values: (Cu:79.0 g/kg, Zn:139 g/kg, Pb:67 g/kg, Cd:0.71 g/kg, Ni:33 g/kg)

10

11

Supplementary materials Table S2 Microbial community diversity index (97% sequence similarity).

| Sample area | No. of seqs |         | No. of OTUs |         | Chao1    |          | Dominance |          | Observed species |         | Shannon  |          | Simpson  |          |
|-------------|-------------|---------|-------------|---------|----------|----------|-----------|----------|------------------|---------|----------|----------|----------|----------|
|             | Bacteria    | Archaea | Bacteria    | Archaea | Bacteria | Archaea  | Bacteria  | Archaea  | Bacteria         | Archaea | Bacteria | Archaea  | Bacteria | Archaea  |
| S1          | 39535       | 379     | 2852        | 26      | 3434.454 | 30.25173 | 0.006206  | 0.22032  | 2588             | 20      | 9.155878 | 1.624835 | 0.993794 | 0.779679 |
| S2          | 30549       | 3933    | 1794        | 22      | 2109.61  | 23.69167 | 0.011783  | 0.250279 | 1770             | 16      | 8.488059 | 2.352446 | 0.988217 | 0.749721 |
| S3          | 38080       | 1387    | 3236        | 106     | 3904.8   | 124.6617 | 0.005608  | 0.083883 | 2969             | 104     | 9.501584 | 4.644679 | 0.994392 | 0.916117 |
| S4          | 36238       | 1592    | 3102        | 115     | 3824.674 | 135.7744 | 0.011628  | 0.069934 | 2885             | 107     | 9.277772 | 4.776795 | 0.988372 | 0.930066 |
| S5          | 28925       | 5349    | 3001        | 53      | 3865.062 | 48.24848 | 0.003756  | 0.74109  | 3001             | 30      | 9.742548 | 1.07126  | 0.996244 | 0.25891  |
| S6          | 39485       | 1281    | 3395        | 88      | 3941.841 | 102.8824 | 0.003816  | 0.133983 | 3105             | 88      | 9.805996 | 4.101433 | 0.996184 | 0.866017 |
| S7          | 36483       | 1432    | 3414        | 101     | 3991.138 | 134.7559 | 0.003589  | 0.120121 | 3203             | 97      | 9.939062 | 4.162279 | 0.996411 | 0.879879 |

12

13

14

15

16

17

18

19

20

21

22

23

24

Supplementary materials Table S3 Pearson correlation analysis between heavy metals and environmental factors.

|       | pH     | Cu      | Zn      | Pb      | Cd       | Ni     | MC     | TOC     | TN     | TP      | AK       | $P_N$   | RI |
|-------|--------|---------|---------|---------|----------|--------|--------|---------|--------|---------|----------|---------|----|
| pH    | 1      |         |         |         |          |        |        |         |        |         |          |         |    |
| Cu    | -0.079 | 1       |         |         |          |        |        |         |        |         |          |         |    |
| Zn    | 0.076  | 0.829*  | 1       |         |          |        |        |         |        |         |          |         |    |
| Pb    | -0.002 | 0.863*  | 0.942** | 1       |          |        |        |         |        |         |          |         |    |
| Cd    | 0.046  | 0.818*  | 0.925** | 0.955** | 1        |        |        |         |        |         |          |         |    |
| Ni    | 0.610  | 0.052   | 0.356   | 0.243   | 0.470    | 1      |        |         |        |         |          |         |    |
| MC    | -0.722 | -0.269  | -0.445  | -0.471  | -0.398   | -0.337 | 1      |         |        |         |          |         |    |
| TOC   | 0.039  | -0.675  | -0.819* | -0.739  | -0.769*  | -0.284 | 0.412  | 1       |        |         |          |         |    |
| TN    | -0.320 | -0.370  | -0.299  | -0.518  | -0.548   | -0.321 | 0.637  | 0.343   | 1      |         |          |         |    |
| TP    | -0.007 | 0.900** | 0.945** | 0.920** | 0.828*   | 0.100  | -0.381 | -0.683  | -0.210 | 1       |          |         |    |
| AK    | -0.248 | -0.647  | -0.760* | -0.858* | -0.926** | -0.595 | 0.508  | 0.556   | 0.742  | -0.643  | 1        |         |    |
| $P_N$ | 0.050  | 0.915** | 0.918** | 0.957** | 0.977**  | 0.365  | -0.409 | -0.769* | -0.556 | 0.872** | -0.882** | 1       |    |
| RI    | 0.027  | 0.874*  | 0.939** | 0.971** | 0.994**  | 0.396  | -0.399 | -0.772* | -0.529 | 0.874*  | -0.900** | 0.992** | 1  |

25

Note: \*\* indicates an extremely significant correlation ( $p < 0.01$ ), and \* indicates a significant correlation ( $p < 0.05$ ).

26

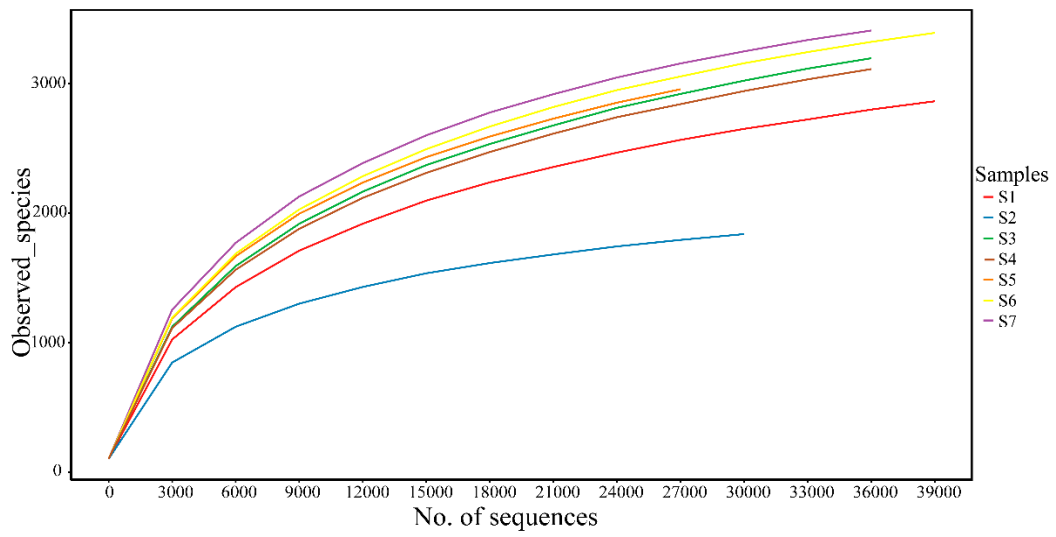

Supplementary materials Fig. S1 Microbial community dilution curve.

Note: Abandoned land (S1); Vegetable filed (S2, S5); Paddy field (S3, S4, S6, and S7).

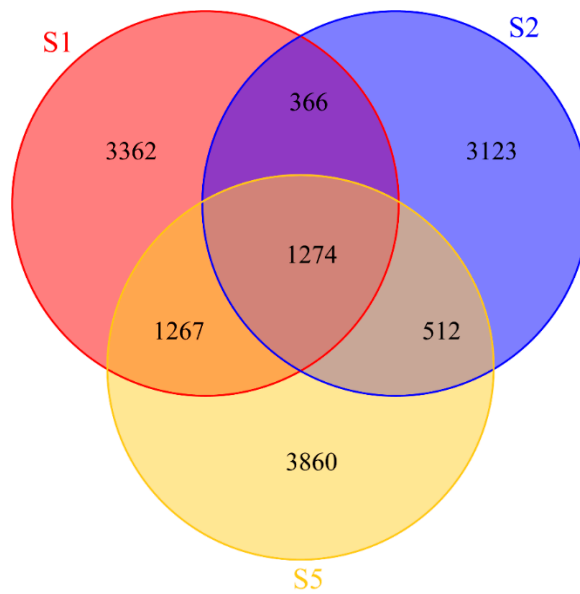

Supplementary materials Fig. S2 Venn diagram of sampling points S1, S2, S5.

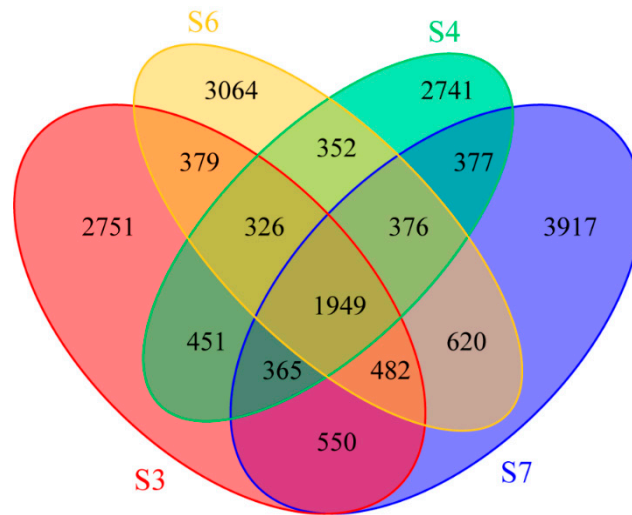

Supplementary materials Fig. S3 Venn diagram of sampling points S3, S4, S6, and S7.

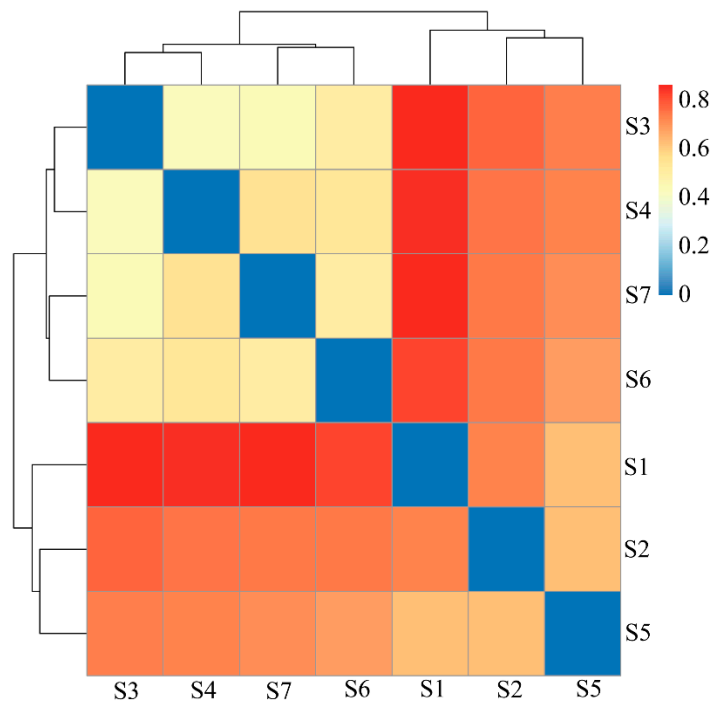

Supplementary materials Fig. S4 Similarity metric heat map based on the Bray-Curtis distance.

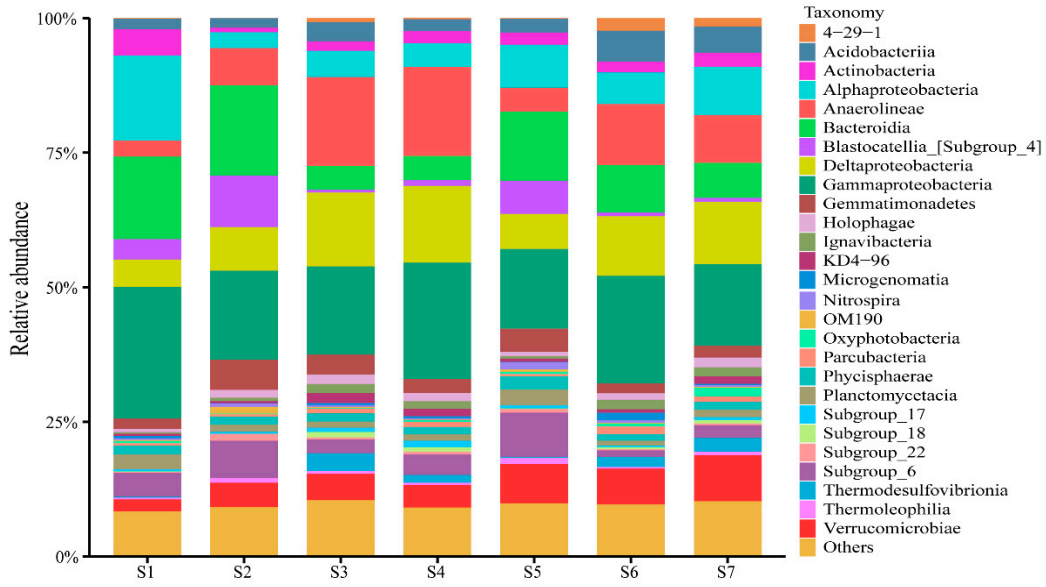

Supplementary materials Fig. S5 Relative abundance (%) of dominant bacteria at the class level.

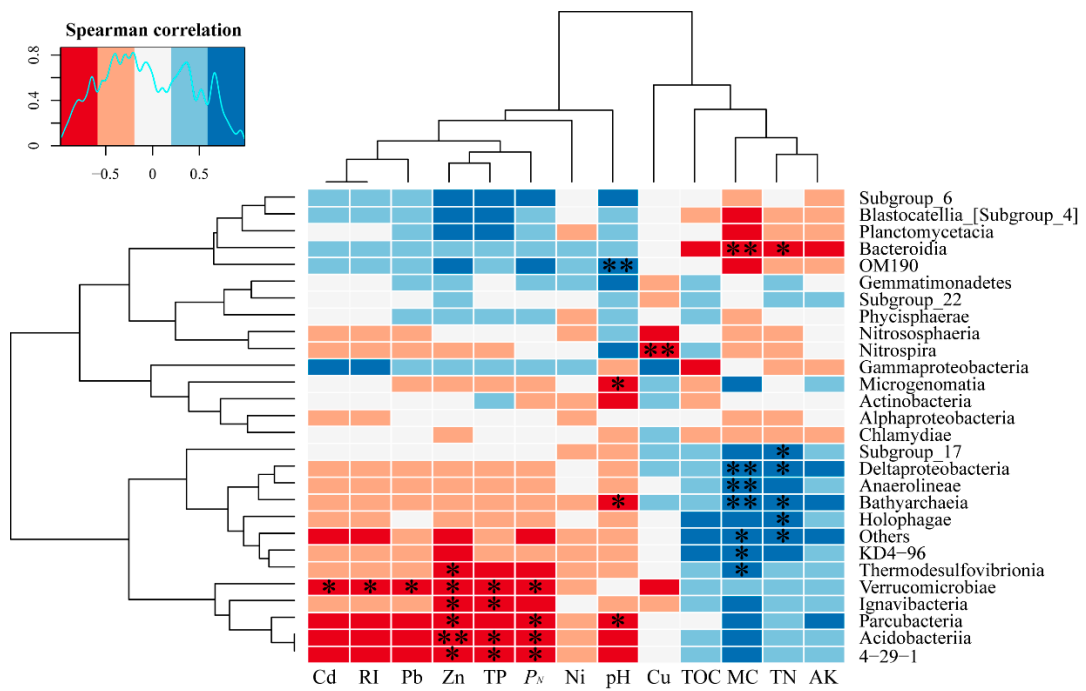

Supplementary materials Fig. S6 Correlation between soil physical and chemical properties and heavy metals and microbial community abundance.
